# Supplementary material for: Polysome profiling reveals translational control of gene expression in the human malaria parasite Plasmodium falciparum
Source: PubMed Central journal article supplement (PMC4053746; doi:10.1186/gb-2013-14-11-r128), 2013-11-22
Supplement: gb-2013-14-11-r128-S4.pdf [file gb-2013-14-11-r128-S4.pdf]

| Gene          | Chromosome | Intron start | Intron end | Intron | Dataset* | Stage          | Steady-state mRNA   |                   | Polysome mRNA       |                   |
|---------------|------------|--------------|------------|--------|----------|----------------|---------------------|-------------------|---------------------|-------------------|
|               |            |              |            |        |          |                | intronic reads/100b | overlapping reads | intronic reads/100b | overlapping reads |
| PF3D7_0103200 | PF3D7_01   | 141,087      | 141,339    | 1      | P        | 36h            | 17                  | 25                | 24                  | 0                 |
| PF3D7_0111000 | PF3D7_01   | 422,497      | 422,731    | 3      | P        | 18h / 36h      | 7                   | 0                 | 111                 | 0                 |
| PF3D7_0209100 | PF3D7_02   | 382,878      | 383,070    | 1      | P        | 0h             | 1                   | 0                 | 12                  | 0                 |
| PF3D7_0214900 | PF3D7_02   | 614,971      | 615,180    | 14     | P        | 0h             | 0                   | 0                 | 12                  | 0                 |
| PF3D7_0314500 | PF3D7_03   | 584,256      | 584,448    | 1      | S        | 0h             | 15                  | 5                 | 0                   | 0                 |
| PF3D7_0321200 | PF3D7_03   | 887,660      | 887,778    | 5      | P        | 36h            | 7                   | 1                 | 13                  | 0                 |
| PF3D7_0321200 | PF3D7_03   | 887,442      | 887,591    | 6      | S        | 36h            | 11                  | 0                 | 7                   | 0                 |
| PF3D7_0404300 | PF3D7_04   | 236,285      | 236,400    | 4      | P        | 0h             | 20                  | 112               | 10                  | 0                 |
| PF3D7_0416000 | PF3D7_04   | 702,569      | 702,695    | 2      | S        | 0h             | 11                  | 4                 | 2                   | 0                 |
| PF3D7_0424500 | PF3D7_04   | 1,112,075    | 1,112,218  | 2      | S        | 0h             | 17                  | 6                 | 3                   | 0                 |
| PF3D7_0506800 | PF3D7_05   | 287,640      | 287,940    | 2      | P        | 18h            | 1                   | 4                 | 22                  | 4                 |
| PF3D7_0525700 | PF3D7_05   | 1,068,768    | 1,069,141  | 1      | P        | 36h            | 5                   | 0                 | 10                  | 0                 |
| PF3D7_0528900 | PF3D7_05   | 1,184,750    | 1,184,915  | 5      | S        | 0h             | 10                  | 1                 | 1                   | 0                 |
| PF3D7_0705800 | PF3D7_07   | 288,477      | 288,670    | 3      | P        | 18h            | 0                   | 0                 | 13                  | 0                 |
| PF3D7_0705800 | PF3D7_07   | 287,804      | 287,912    | 6      | S        | 0h             | 11                  | 0                 | 0                   | 0                 |
| PF3D7_0706300 | PF3D7_07   | 305,878      | 305,990    | 1      | S        | 0h             | 58                  | 7                 | 1                   | 0                 |
| PF3D7_0726200 | PF3D7_07   | 1,100,231    | 1,100,413  | 1      | S        | 0h             | 50                  | 0                 | 7                   | 0                 |
| PF3D7_0806600 | PF3D7_08   | 352,734      | 353,310    | 1      | S        | 0h             | 12                  | 0                 | 0                   | 0                 |
| PF3D7_0807300 | PF3D7_08   | 381,628      | 381,862    | 1      | S        | 0h             | 15                  | 0                 | 3                   | 0                 |
| PF3D7_0813400 | PF3D7_08   | 659,128      | 660,157    | 2      | P        | 18h / 36h      | 4                   | 103               | 60                  | 19                |
| PF3D7_0828900 | PF3D7_08   | 1,242,298    | 1,242,438  | 3      | S        | 36h            | 11                  | 3                 | 1                   | 0                 |
| PF3D7_0902300 | PF3D7_09   | 104,347      | 104,467    | 1      | S        | 0h             | 12                  | 0                 | 2                   | 0                 |
| PF3D7_0911000 | PF3D7_09   | 501,890      | 502,033    | 9      | S        | 36h            | 17                  | 3                 | 1                   | 0                 |
| PF3D7_0911000 | PF3D7_09   | 502,074      | 502,206    | 10     | S        | RS             | 26                  | 2                 | 2                   | 50                |
| PF3D7_0916000 | PF3D7_09   | 667,315      | 667,424    | 3      | S        | 0h             | 15                  | 0                 | 1                   | 0                 |
| PF3D7_0922100 | PF3D7_09   | 899,660      | 899,831    | 1      | P        | 18h            | 2                   | 50                | 19                  | 3                 |
| PF3D7_0934600 | PF3D7_09   | 1,354,665    | 1,354,847  | 1      | S        | 0h             | 11                  | 4                 | 1                   | 0                 |
| PF3D7_0935500 | PF3D7_09   | 1,401,880    | 1,402,000  | 2      | S + P    | 18h / 36h      | 20                  | 0                 | 37                  | 0                 |
| PF3D7_1005800 | PF3D7_10   | 252,129      | 252,359    | 1      | S        | 18h            | 16                  | 0                 | 3                   | 0                 |
| PF3D7_1013400 | PF3D7_10   | 520,420      | 520,623    | 4      | P        | 18h / 36h      | 4                   | 2                 | 51                  | 2                 |
| PF3D7_1014000 | PF3D7_10   | 552,111      | 552,220    | 1      | S        | 18h            | 13                  | 1                 | 0                   | 0                 |
| PF3D7_1017400 | PF3D7_10   | 699,265      | 699,368    | 2      | S        | 0h             | 11                  | 0                 | 0                   | 0                 |
| PF3D7_1017400 | PF3D7_10   | 698,812      | 698,913    | 4      | S        | 0h             | 16                  | 3                 | 0                   | 0                 |
| PF3D7_1020200 | PF3D7_10   | 817,788      | 818,136    | 2      | P        | 18h            | 1                   | 0                 | 13                  | 0                 |
| PF3D7_1027900 | PF3D7_10   | 1,158,399    | 1,158,513  | 7      | S        | 0h             | 17                  | 0                 | 5                   | 0                 |
| PF3D7_1037900 | PF3D7_10   | 1,503,517    | 1,503,703  | 2      | S        | 0h             | 11                  | 2                 | 0                   | 0                 |
| PF3D7_1103000 | PF3D7_11   | 138,835      | 138,947    | 1      | S        | 0h             | 14                  | 2                 | 1                   | 0                 |
| PF3D7_1108500 | PF3D7_11   | 367,684      | 367,962    | 2      | P        | 0h             | 0                   | 0                 | 24                  | 0                 |
| PF3D7_1111600 | PF3D7_11   | 450,943      | 451,224    | 1      | P        | 0h             | 0                   | 0                 | 12                  | 0                 |
| PF3D7_1125000 | PF3D7_11   | 984,412      | 984,581    | 4      | S        | 0h             | 21                  | 0                 | 1                   | 0                 |
| PF3D7_1136900 | PF3D7_11   | 1,458,892    | 1,459,034  | 1      | S        | 0h             | 19                  | 0                 | 0                   | 0                 |
| PF3D7_1145300 | PF3D7_11   | 1,798,855    | 1,799,053  | 3      | P        | 0h             | 2                   | 1                 | 12                  | 0                 |
| PF3D7_1145300 | PF3D7_11   | 1,799,123    | 1,799,293  | 2      | P        | 36h            | 2                   | 0                 | 14                  | 0                 |
| PF3D7_1149500 | PF3D7_11   | 1,993,688    | 1,993,826  | 1      | P        | 0h             | 0                   | 0                 | 12                  | 0                 |
| PF3D7_1226400 | PF3D7_12   | 1,067,708    | 1,067,849  | 3      | S        | 0h             | 13                  | 0                 | 0                   | 0                 |
| PF3D7_1226400 | PF3D7_12   | 1,067,509    | 1,067,661  | 4      | S        | 0h             | 24                  | 0                 | 0                   | 0                 |
| PF3D7_1226800 | PF3D7_12   | 1,085,468    | 1,085,857  | 1      | S        | 36h            | 19                  | 0                 | 8                   | 0                 |
| PF3D7_1231700 | PF3D7_12   | 1,306,594    | 1,306,834  | 1      | S        | 0h             | 15                  | 1                 | 0                   | 0                 |
| PF3D7_1240900 | PF3D7_12   | 1,741,003    | 1,742,004  | 1      | P        | 0h             | 5                   | 22                | 18                  | 0                 |
| PF3D7_1242400 | PF3D7_12   | 1,796,494    | 1,796,867  | 2      | P        | 18h            | 7                   | 1                 | 13                  | 0                 |
| PF3D7_1315400 | PF3D7_13   | 649,263      | 650,039    | 3      | P        | 0h / 18h / 36h | 74                  | 183               | 178                 | 10                |
| PF3D7_1315600 | PF3D7_13   | 655,530      | 655,608    | 7      | S        | 36h            | 22                  | 0                 | 0                   | 1                 |
| PF3D7_1325200 | PF3D7_13   | 1,048,340    | 1,048,635  | 2      | P        | 0h             | 1                   | 0                 | 17                  | 0                 |
| PF3D7_1326200 | PF3D7_13   | 1,090,403    | 1,090,520  | 2      | S        | 18h            | 11                  | 0                 | 3                   | 0                 |
| PF3D7_1328600 | PF3D7_13   | 1,211,622    | 1,211,724  | 1      | P        | 0h             | 0                   | 0                 | 12                  | 0                 |
| PF3D7_1329400 | PF3D7_13   | 1,245,688    | 1,245,863  | 5      | S        | 0h             | 11                  | 0                 | 0                   | 0                 |
| PF3D7_1329400 | PF3D7_13   | 1,246,141    | 1,246,277  | 7      | S        | 0h             | 14                  | 4                 | 4                   | 0                 |
| PF3D7_1334500 | PF3D7_13   | 1,407,571    | 1,407,909  | 1      | P        | 18h            | 1                   | 0                 | 18                  | 0                 |
| PF3D7_1356900 | PF3D7_13   | 2,264,399    | 2,264,616  | 1      | S        | 0h             | 14                  | 2                 | 1                   | 0                 |
| PF3D7_1360700 | PF3D7_13   | 2,427,884    | 2,429,115  | 4      | P        | 18h            | 1                   | 4                 | 30                  | 0                 |
| PF3D7_1409400 | PF3D7_14   | 365,913      | 366,181    | 3      | P        | 0h             | 0                   | 12                | 12                  | 0                 |
| PF3D7_1410800 | PF3D7_14   | 435,109      | 435,246    | 6      | S        | 18h / 36h      | 25                  | 0                 | 1                   | 0                 |
| PF3D7_1428400 | PF3D7_14   | 1,108,986    | 1,109,148  | 6      | S        | 0h             | 11                  | 0                 | 2                   | 0                 |
| PF3D7_1446700 | PF3D7_14   | 1,919,613    | 1,919,717  | 7      | S        | 18h / 36h      | 23                  | 0                 | 4                   | 0                 |
| PF3D7_1449100 | PF3D7_14   | 2,012,321    | 2,012,422  | 6      | S        | 36h            | 19                  | 1                 | 0                   | 0                 |
| PF3D7_1463900 | PF3D7_14   | 2,584,953    | 2,585,281  | 13     | P        | 0h             | 0                   | 0                 | 13                  | 0                 |
| PF3D7_1464600 | PF3D7_14   | 2,623,217    | 2,623,396  | 1      | S + P    | 18h / 36h      | 166                 | 85                | 262                 | 16                |

\*Dataset is indicated as S for steady-state mRNA or P for polysome-associated mRNA
